# Supplementary material for: PssJ Is a Terminal Galactosyltransferase Involved in the Assembly of the Exopolysaccharide Subunit in Rhizobium leguminosarum bv. Trifolii
Source: Int J Mol Sci. 2020 Oct 20;21(20):7764. doi: 10.3390/ijms21207764 (PMC7589315; doi:10.3390/ijms21207764)
Supplement: Supplementary file 1 [file ijms-21-07764-s001.pdf]

# **PssJ is a terminal galactosyltransferase involved in the assembly of the exopolysaccharide subunit in *Rhizobium leguminosarum* bv. *trifolii***

**Małgorzata Marczak<sup>1\*</sup>, Magdalena Wójcik<sup>1\*\*</sup>, Kamil Żebracki<sup>1\*\*</sup>, Anna Turska-Szewczuk<sup>1</sup>, Kamila Talarek<sup>1</sup>, Dominika Nowak<sup>1</sup>, Leszek Wawiórka<sup>2</sup>, Marcin Sieńczyk<sup>3</sup>, Agnieszka Łupicka-Słowik<sup>3</sup>, Kamila Bobrek<sup>4</sup>, Marcelli Romańczuk<sup>1</sup>, Piotr Koper<sup>1</sup> and Andrzej Mazur<sup>1</sup>**

<sup>1</sup> Department of Genetics and Microbiology, Institute of Biological Sciences, Maria Curie-Skłodowska University

<sup>2</sup> Department of Molecular Biology, Institute of Biological Sciences, Maria Curie-Skłodowska University

<sup>3</sup> Department of Organic and Medical Chemistry, Faculty of Chemistry, Wrocław University of Science and Technology

<sup>4</sup> Department of Epizootiology and Clinic of Bird and Exotic Animals, Faculty of Veterinary Medicine, Wrocław University of Environmental and Life Sciences

\* corresponding author

\*\* contributed equally to this work

## **Supplementary files**

**Table S1.** PssJ homologs revealed by ProtBLAST/PSI-BLAST similarity searches. Selected top records not described as “hypothetical” were summarized and chosen for the alignment shown in Figure 2.

| Accession number | Subject amino acid range | Predicted function                   | Organism or group of organisms (in case of metagenomic data) | Percentage of identity/coverage between query and subject |
|------------------|--------------------------|--------------------------------------|--------------------------------------------------------------|-----------------------------------------------------------|
| RYH00067.1       | 3-266                    | galactosyl transferase               | Alphaproteobacteria                                          | 50/97                                                     |
| TAN00599.1       | 1-205                    | galactosyl transferase, partial      | Rhizobiaceae                                                 | 65/75                                                     |
| PZU46882.1       | 4-264                    | galactosyl transferase               | <i>Sphingomonas</i> sp.                                      | 50/96                                                     |
| TAA47749.1       | 22-268                   | galactosyl transferase               | <i>Corallincola spongiicola</i>                              | 46/91                                                     |
| WP_143103296.1   | 4-266                    | galactosyl transferase               | <i>Albimonas pacifica</i> SFI10148.1                         | 47/97                                                     |
| TIY02532.1       | 126-268                  | galactosyl transferase, partial      | <i>Mesorhizobium</i> sp.                                     | 72/53                                                     |
| WP_158720787.1   | 3-244                    | galactosyl transferase               | <i>Xenophilus</i> sp. L33                                    | 47/89                                                     |
| WP_134680296.1   | 4-264                    | glycosyltransferase family 2 protein | <i>Paracoccus</i> sp. YJ057                                  | 44/94                                                     |
| WP_155999281.1   | 1-266                    | galactosyl transferase               | <i>Thioalkalivibrio</i> sp. ALJ16                            | 44 /96                                                    |

**Table S2.** Top ten top templates used to model PssJ structure with Phyre2.

| PDB number | % coverage of query | Confidence = probability that sequences are homologous | Template information                                                                                                                                                                  |
|------------|---------------------|--------------------------------------------------------|---------------------------------------------------------------------------------------------------------------------------------------------------------------------------------------|
| d1xhba2    | 91                  | 100                                                    | Superfamily: Nucleotide-diphospho-sugar transferases; Family: polypeptide N-acetylgalactosaminyltransferase 1, N-terminal domain                                                      |
| c2z86D     | 84                  | 100                                                    | Molecule: chondroitin synthase; PDB title: crystal structure of chondroitin polymerase from <i>Escherichia coli</i> complexed with UDP-GlcUA and UDP                                  |
| c6h4mA     | 95                  | 100                                                    | Molecule: probable ss-1,3-N-acetylglucosaminyltransferase                                                                                                                             |
| c5tz8C     | 95                  | 100                                                    | Molecule: glycosyltransferase; PDB title: crystal structure of <i>S. aureus</i> TarS                                                                                                  |
| c6e4rB     | 89                  | 100                                                    | Molecule: polypeptide N-acetylgalactosaminyltransferase 9; PDB title: crystal structure of the <i>Drosophila melanogaster</i> polypeptide N-2 acetylgalactosaminyltransferase PGANT9B |
| c2ffuA     | 86                  | 100                                                    | Molecule: polypeptide N-acetylgalactosaminyltransferase 2; PDB title: crystal structure of human ppGalNAcT-2 complexed with UDP and EA2                                               |
| c5nqaA     | 89                  | 100                                                    | Molecule: polypeptide N-acetylgalactosaminyltransferase 4; PDB title: crystal structure of GalNAc-T4 in complex with the monoglycopeptide 3                                           |
| c6pxuA     | 90                  | 100                                                    | Molecule: polypeptide N-acetylgalactosaminyltransferase 12; PDB title: crystal structure of human GalNAc-T12 bound to a diglycosylated peptide, Mn <sup>2+</sup> , and UDP            |
| c1xhbA     | 89                  | 100                                                    | Molecule: polypeptide N-acetylgalactosaminyltransferase 1; PDB title: the crystal structure of UDP-GalNAc:polypeptide N-acetylgalactosaminyltransferase T1                            |
| c2d7iA     | 78                  | 100                                                    | Molecule: polypeptide N- acetylgalactosaminyltransferase 10; PDB title: crystal structure of pp-GalNAc-T10 with UDP, GalNAc and Mn <sup>2+</sup>                                      |

**Table S3.** Results of sensitivity test of RtTA1,  $\Delta pssJ$  and  $\Delta pssJ(pssJ)$  towards ethanol (1-6%), pH of the medium (5.3-7.2) and sodium dodecyl sulfate concentration (0.01-0.05%).

|                     |         |       | WT                                                                                  | $\Delta pssJ$                                                                       | $\Delta pssJ(pssJ)$                                                                  |
|---------------------|---------|-------|-------------------------------------------------------------------------------------|-------------------------------------------------------------------------------------|--------------------------------------------------------------------------------------|
| Sensitivity towards | Ethanol | 1%    | 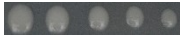   | 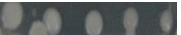   | 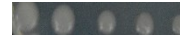   |
|                     |         | 2%    | 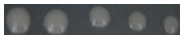   | 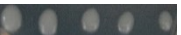   | 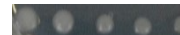   |
|                     |         | 3%    | 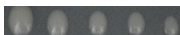   | 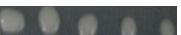   | 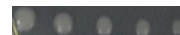   |
|                     |         | 4%    | 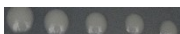   | 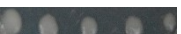   | 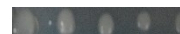   |
|                     |         | 5%    | 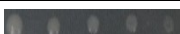   | 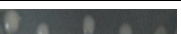   | 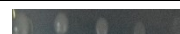   |
|                     |         | 6%    | 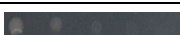   | 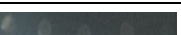   | 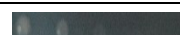   |
|                     | pH      | 5.3   | 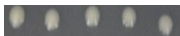   | 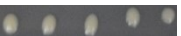   | 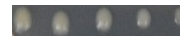   |
|                     |         | 5.7   | 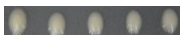   | 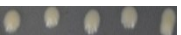   | 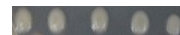   |
|                     |         | 6.2   | 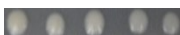   | 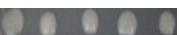   | 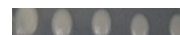   |
|                     |         | 6.7   | 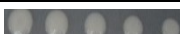   | 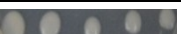   | 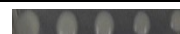   |
|                     |         | 7.2   | 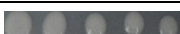   | 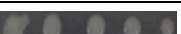   | 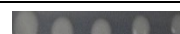   |
|                     | SDS     | 0.01% | 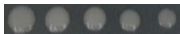   | 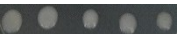   | 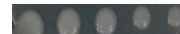   |
|                     |         | 0.02% | 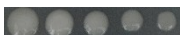  | 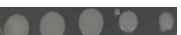  | 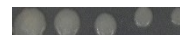  |
|                     |         | 0.03% | 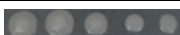 | 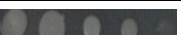 | 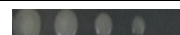 |
|                     |         | 0.04% | 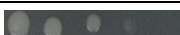 | 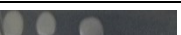 | 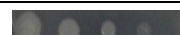 |
|                     |         | 0.05% | 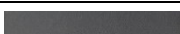 | 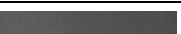 | 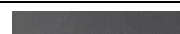 |

**Table S4.** Activity of  $\beta$ -galactosidase in *E. coli* DHM1 carrying two plasmids encoding bait and prey Pss proteins, either glycosyltransferases (PssA, PssC, PssD, PssE, PssS, PssF, PssG, PssH, PssI, and PssJ) or translocation/polymerization proteins PssT, PssP, PssL, and PssP2. Presented values are the means of three independent experiments with two technical repeats each. Values marked in blue represent 2-fold increase in activity relative mean value of negative controls ( $94.8 \pm 5.1$  Miller units), which is considered a positive interaction. Mean activity of  $\beta$ -galactosidase in positive control, i.e. for pUT18C-zip + pKT25-zip pair was  $727.1 \pm 43.0$  Miller units.

|          | T25-PssA         | PssA-T25         |
|----------|------------------|------------------|
| PssJ-T18 | 112.2 $\pm$ 26.9 | 100.6 $\pm$ 1.3  |
| T18-PssJ | 865.5 $\pm$ 56.3 | 100.3 $\pm$ 2.9  |
| T25-PssJ | 101.3 $\pm$ 12.2 | 197.6 $\pm$ 24.4 |
| PssJ-T25 | 103.9 $\pm$ 7.2  | 139.0 $\pm$ 13.0 |
|          | PssA-T18         | T18-PssA         |

|          | T25-PssC         | PssC-T25         |
|----------|------------------|------------------|
| PssJ-T18 | 187.0 $\pm$ 18.2 | 238.7 $\pm$ 25.4 |
| T18-PssJ | 967.8 $\pm$ 69.6 | 117.7 $\pm$ 12.5 |
| T25-PssJ | 851.2 $\pm$ 98.9 | 293.6 $\pm$ 28.0 |
| PssJ-T25 | 356.9 $\pm$ 67.2 | 103.2 $\pm$ 6.4  |
|          | PssC-T18         | T18-PssC         |

|          | T25-PssD         | PssD-T25         |
|----------|------------------|------------------|
| PssJ-T18 | 131.2 $\pm$ 31.2 | 104.8 $\pm$ 13.0 |
| T18-PssJ | 219.0 $\pm$ 15.0 | 120.0 $\pm$ 22.4 |
| T25-PssJ | 165.5 $\pm$ 15.3 | 123.9 $\pm$ 9.0  |
| PssJ-T25 | 175.1 $\pm$ 11.2 | 112.3 $\pm$ 7.8  |
|          | PssD-T18         | T18-PssD         |

|          | T25-PssE         | PssE-T25         |
|----------|------------------|------------------|
| PssJ-T18 | 109.0 $\pm$ 4.0  | 111.7 $\pm$ 13.4 |
| T18-PssJ | 94.0 $\pm$ 10.0  | 121.6 $\pm$ 4.0  |
| T25-PssJ | 94.4 $\pm$ 2.2   | 103.5 $\pm$ 2.5  |
| PssJ-T25 | 106.3 $\pm$ 13.4 | 101.8 $\pm$ 9.8  |
|          | PssE-T18         | T18-PssE         |

|          | T25-PssS        | PssS-T25        |
|----------|-----------------|-----------------|
| PssJ-T18 | 101.5 $\pm$ 2.8 | 96.8 $\pm$ 3.3  |
| T18-PssJ | 102.9 $\pm$ 3.0 | 88.8 $\pm$ 17.2 |
| T25-PssJ | 105.9 $\pm$ 3.8 | 97.7 $\pm$ 7.0  |
| PssJ-T25 | 97.8 $\pm$ 8.7  | 104.8 $\pm$ 7.6 |
|          | PssS-T18        | T18-PssS        |

|          | T25-PssF         | PssF-T25         |
|----------|------------------|------------------|
| PssJ-T18 | 102.4 $\pm$ 10.8 | 107.1 $\pm$ 10.9 |
| T18-PssJ | 428.0 $\pm$ 10.9 | 272.3 $\pm$ 53.7 |
| T25-PssJ | 104.4 $\pm$ 10.6 | 398.4 $\pm$ 77.7 |
| PssJ-T25 | 101.9 $\pm$ 7.3  | 106.3 $\pm$ 9.2  |
|          | PssF-T18         | T18-PssF         |

|          | T25-PssG     | PssG-T25    |
|----------|--------------|-------------|
| PssJ-T18 | 83.6 ± 11.0  | 107.4 ± 5.9 |
| T18-PssJ | 732.7 ± 42.7 | 100.2 ± 7.1 |
| T25-PssJ | 180.3 ± 12.1 | 107.8 ± 5.8 |
| PssJ-T25 | 150.9 ± 18.9 | 105.7 ± 9.9 |
|          | PssG-T18     | T18-PssG    |

|          | T25-PssH     | PssH-T25     |
|----------|--------------|--------------|
| PssJ-T18 | 100.1 ± 4.3  | 97.3 ± 6.3   |
| T18-PssJ | 230.9 ± 29.4 | 125.5 ± 14.7 |
| T25-PssJ | 132.2 ± 12.1 | 160.0 ± 33.1 |
| PssJ-T25 | 108.4 ± 8.4  | 100.8 ± 6.7  |
|          | PssH-T18     | T18-PssH     |

|          | T25-PssI     | PssI-T25      |
|----------|--------------|---------------|
| PssJ-T18 | 130.2 ± 11.2 | 296.3 ± 38.6  |
| T18-PssJ | 503.5 ± 43.0 | 91.6 ± 3.5    |
| T25-PssJ | 440.5 ± 51.1 | 312.1 ± 26.3  |
| PssJ-T25 | 384.0 ± 93.3 | 211.7 ± 105.9 |
|          | PssI-T18     | T18-PssI      |

|          | T25-PssJ     | PssJ-T25     |
|----------|--------------|--------------|
| PssJ-T18 | 132.9 ± 4.0  | 133.6 ± 14.0 |
| T18-PssJ | 317.3 ± 56.6 | 326.3 ± 78.6 |

|          | T25-PssP    |
|----------|-------------|
| PssJ-T18 | 95.7 ± 4.8  |
| T18-PssJ | 93.4 ± 2.3  |
| T25-PssJ | 104.6 ± 5.7 |
| PssJ-T25 | 98.1 ± 6.7  |
|          | T18-PssP    |

|          | T25-PssT     |              |
|----------|--------------|--------------|
| PssJ-T18 | 216.1 ± 16.5 |              |
| T18-PssJ | 129.9 ± 26.1 |              |
| T25-PssJ | 104.2 ± 1.2  | 114.9 ± 15.8 |
| PssJ-T25 | 98.3 ± 3.4   | 106.1 ± 7.4  |
|          | PssT-T18     | T18-PssT     |

|          | T25-PssL    |             |
|----------|-------------|-------------|
| PssJ-T18 | 100 ± 1.3   |             |
| T18-PssJ | 100.6 ± 4.4 |             |
| T25-PssJ | 101.7 ± 9.1 | 100.4 ± 1.5 |
| PssJ-T25 | 107.9 ± 7.7 | 122.1 ± 0.7 |
|          | PssL-T18    | T18-PssL    |

|          | T25-PssP2   |              |
|----------|-------------|--------------|
| PssJ-T18 | 154.6 ± 9.3 |              |
| T18-PssJ | 98.0 ± 2.2  |              |
| T25-PssJ | 110.4 ± 4.0 | 112.3 ± 11.9 |

|          |                 |                  |
|----------|-----------------|------------------|
| PssJ-T25 | 100.4 $\pm$ 3.7 | 193.9 $\pm$ 22.0 |
|          | PssP2-T18       | T18-PssP2        |

**Table S5.** List of primers used in this work

| Name              | Sequence (5'–3')                                   | T <sub>m</sub> (°C) | Application                                                                 |
|-------------------|----------------------------------------------------|---------------------|-----------------------------------------------------------------------------|
| pssJ-U_FwNde      | aaacatatgGCAGATCATCCAGTTCCCGCAGTC                  | 65                  | amplification of genomic fragments for $\Delta pssJ$ mutant construction    |
| pssJ-U_RvNde      | aaacatatgCGAATGACCCCCTTAAGCCCGCAA                  | 67                  |                                                                             |
| pssJ-D_FwApa      | aagggcccGCGCCGATCCCATTCTGAACA                      | 64                  |                                                                             |
| pssJ-D_RvSac      | agagctcCCCAGACTTTCGTCGGGTCACACG                    | 67                  |                                                                             |
| pssJ-C_FwApa      | aagggcccCTCGCTCGAGGACGGAATAG A                     | 61                  | amplification of genomic fragments for $\Delta pssJ$ mutant complementation |
| pssJ-C_RvXba      | aatctagaTTGGTGAAGTCGAAAGAGAA AAGC                  | 58                  |                                                                             |
| pssJ-C-His6_FwApa | aagggcccCTCGCTCGAGGACGGAATAG AGTGG                 | 66                  |                                                                             |
| pssJ-C-His6_RvXba | aatctagattaatgatgatgatgatggtgCGCGGGG GTCGACCGCGTCT | 72                  |                                                                             |
| pCMFw1            | GGGTTCCGCGCACATTTTC                                | 61                  | validation of cloning and sequencing of the pCM351 derivatives              |
| pCMRv1            | GCTGCGTTCGGTCAAGGT                                 | 62                  |                                                                             |
| pCMFw2            | CCTAACAATTCGTTCAAGCCGA                             | 58                  |                                                                             |
| pCMRv2            | CGCGCGAACGACATGGAG                                 | 63                  |                                                                             |
| M13pUCf           | CCCAGTCACGAAGTTGTAAAACG                            | 59                  | validation of cloning and sequencing of the pBBR1-MCS2 derivatives          |
| M13pUCr           | AGCGGATAACAATTCACACAGG                             | 58                  |                                                                             |
| pUT18CFwSeq       | CGGCGTGGCGGGGAAAAG                                 | 67                  | Sequencing of BTH plasmids derivatives                                      |
| pUT18RvSeq        | CGTGCGCCCGCCTGTTCA                                 | 69                  |                                                                             |
| pKT25FwSeq        | CAAGGGCGGCGACGATTTTC                               | 63                  |                                                                             |
| pKNT25RvSeq       | CCACCCCTTCGGCAATCA                                 | 61                  |                                                                             |
| pssAFwBTH         | AAATCTAGAAGTGACAGGGTTAACC ATTGA                    | 56                  | BTH cloning of <i>pssA</i> gene                                             |
| pssARvBTH         | AAAGGTACCCCGAAGCCTTTACCACCGGTCA                    | 63                  |                                                                             |
| pssCFwBTH         | AAATCTAGAAAATCAGCAACAGACTT TTCC                    | 53                  | BTH cloning of <i>pssC</i> gene                                             |
| pssCRvBTH         | AAAGGTACCCCGTGGCGGCATTGGG TTTGT                    | 69                  |                                                                             |
| pssDFwBTH         | AAATCTAGAAGCTGAGAAAAAATTG AAGGT                    | 52                  | BTH cloning of <i>pssD</i> gene                                             |
| pssDRvBTH         | AAAGGTACCCCAAGGACAGCTCCTGC GTAGT                   | 65                  |                                                                             |
| pssEFwBTH         | AAATCTAGAAATTCTCGTCACCGTCG GAAC                    | 60                  | BTH cloning of <i>pssE</i> gene                                             |
| pssERvBTH         | AAAGGTACCCCGACGGCGGCAATAT AATTTT                   | 59                  |                                                                             |
| pssFFwBTH         | AAATCTAGAATTGAAATTATCGGTGC TTAT                    | 49                  | BTH cloning of <i>pssF</i> gene                                             |
| pssFRvBTH         | AAAGGTACCCCTGACTGTCCTCTCCG CAGCA                   | 67                  |                                                                             |

|                      |                                       |    |                                                 |
|----------------------|---------------------------------------|----|-------------------------------------------------|
| pssGFwBTH            | AAATCTAGAAACGGATCCGAGAATT<br>AGTGT    | 56 | BTH cloning of <i>pssG</i> gene                 |
| pssGRvBTH            | AAAGGTACCCCATGCACGACCTCCTG<br>CGCTA   | 68 |                                                 |
| pssHFwBTH            | AAATCTAGAAAGCAAAGTCAAGGTT<br>ACAAT    | 52 | BTH cloning of <i>pssH</i> gene                 |
| pssHRvBTH            | AAAGGTACCCCTTTGGCGCCGACCTG<br>AGAGT   | 68 |                                                 |
| pssIFwBTH            | AAATCTAGAATCGGATCTCTTCGTCA<br>GCGT    | 56 | BTH cloning of <i>pssI</i> gene                 |
| pssIRvBTH            | AAAGGTACCCCTGCGTCATCGTCTG<br>AGAAA    | 62 |                                                 |
| pssJ-BTH_FwPst       | AAACTGCAGAAACACTTGTCACCTTCA<br>TTAT   | 51 | BTH cloning of <i>pssJ</i> gene                 |
| pssJ-<br>pKT25_FwPst | AAACTGCAGAAACACTTGTCACCTTC<br>ATTAT   | 51 |                                                 |
| pssJRvBTH            | AAAGGATCCCCCGCGGGGGTTCGACC<br>GCGTCT  | 72 |                                                 |
| pssSFwBTH            | AAATCTAGAAAAAAAAGCCGTTATTT<br>ATGT    | 47 | BTH cloning of <i>pssS</i> gene                 |
| pssSRvBTH            | AAAGGATCCCCAGTCCGACCCCGGCT<br>GGAAA   | 70 |                                                 |
| pssJpET30Fw          | AAAGGATCCTGACACTTGTCACCTTC<br>ATTATCC | 57 | Cloning of <i>pssJ</i> gene in pET30c<br>vector |
| pssJpET30Rv          | AAACTCGAGTTACGCGGGGGTTCGAC            | 61 |                                                 |

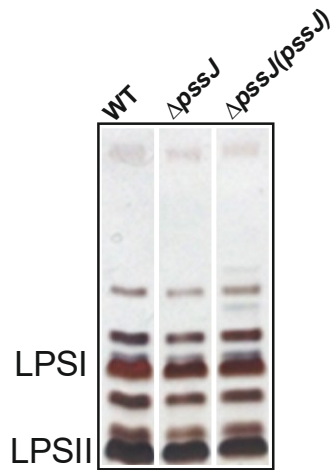

**Figure S1.** Lipopolysaccharide profiles of RtTA1 strain and its derivatives:  $\Delta pssJ$  and  $\Delta pssJ(pssJ)$  separated by SDS-PAGE and visualized by silver staining after oxidation with periodate. LPSI, high-molecular-weight LPS with O-antigen, LPSII, low-molecular-weight LPS, representing the lipid A-core oligosaccharide species.

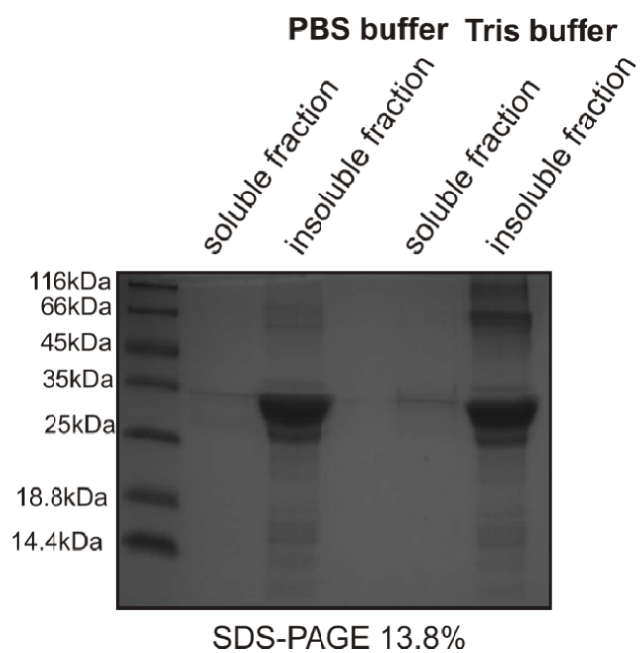

**Figure S2.** Refolding trial of His<sub>6</sub>-PssJ from solubilized inclusion bodies. Protein eluted from the Ni-NTA resin was subjected to refolding through overnight dialysis. No refolding was observed and 100% of protein was precipitated from the solution (insoluble fraction).

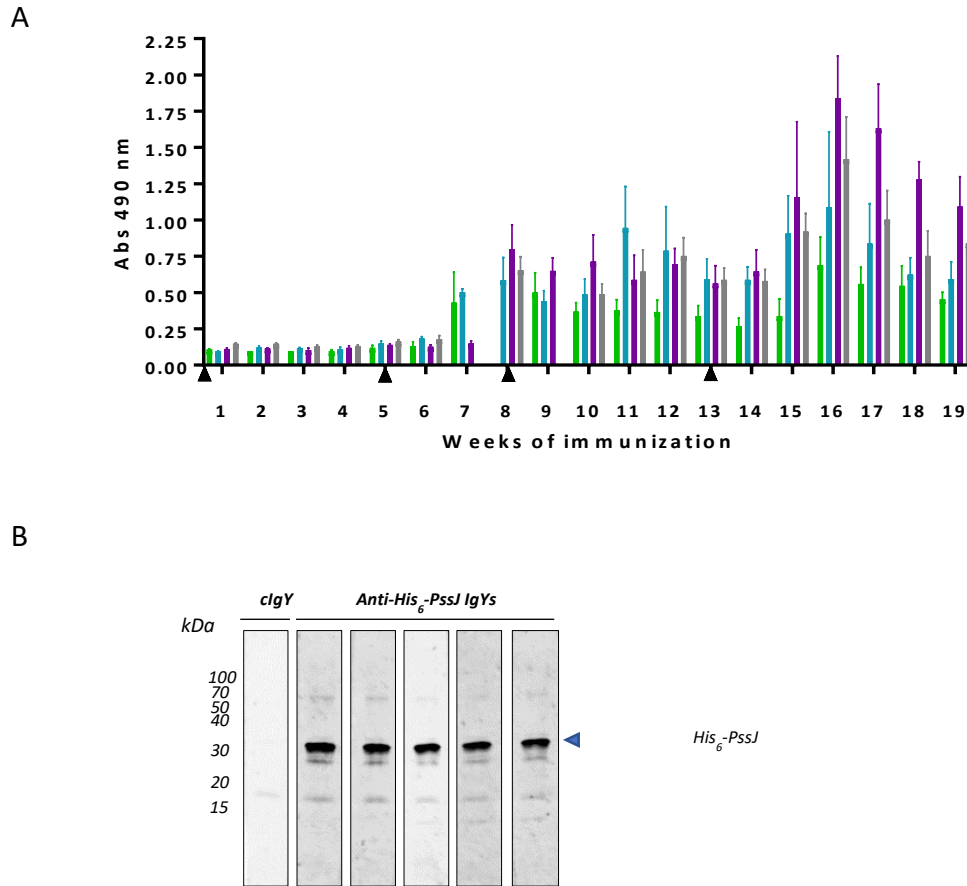

**Figure S3.** Development of antigen-specific IgY antibodies. **(A)** Analysis of the production of specific IgY antibodies isolated from egg yolks performed for the screening purposes (isolates from individual hens are marked with colors). Weeks of immunization are marked with arrowheads. The plate was coated with His<sub>6</sub>-PssJ protein (0.5 µg/ml) and free binding sites were blocked with 5% skimmed milk in PBST. Subsequently, wells were incubated with IgYs diluted in 0.5% skimmed milk in PBST (1:100). Detection of the resulting complexes was performed using rabbit anti-IgY IgG-HRP antibodies (1:5000) with *o*-phenylenediamine as a substrate. Results from different plates are expressed as absorbance values (Abs 490). The assigned points for specific weeks represent the mean absorbance of the measurements performed in duplicate for the eggs collected from hen in particular week. **(B)** Western blot analysis of the anti-His<sub>6</sub>-PssJ IgYs was performed after electrophoretic separation of His<sub>6</sub>-PssJ protein (100 ng/well, SDS-PAGE 4-12%, reducing conditions) and electrotransfer to a nitrocellulose membrane. After blocking the membrane, the strips were incubated with anti-His<sub>6</sub>-PssJ IgY antibodies or with control antibodies (cIgY; isolated from eggs collected from chickens after injection only with Freund's adjuvant) diluted 100-times in 0.5% skimmed milk in PBST. Rabbit anti-IgY IgG-HRP antibodies (1:5000) were used for detection. The images were visualized with a chemiluminescent substrate and a molecular imaging system equipped with a CCD camera. The blue arrowhead indicates bands from the His<sub>6</sub>-PssJ protein.

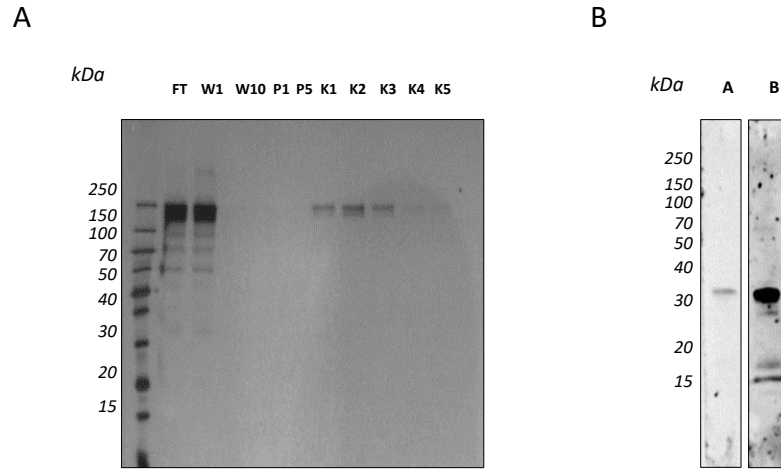

**Figure S4.** His<sub>6</sub>-PssJ protein-highly reactive IgYs were purified *via* affinity chromatography in order to enrich the antibody fraction with antigen-specific immunoglobulins. For this purpose, cyanogen bromide activated resin (Thermo Scientific, Gdańsk, Poland) was modified with His<sub>6</sub>-PssJ protein based on the manufacturer protocol. Firstly, the resin (500 mg) was preactivated with 1 mM HCl and washed with an affinity chromatography coupling buffer (100 mM sodium hydrogen carbonate, 500 mM sodium chloride, pH 8.0). Then, the solution of His<sub>6</sub>-PssJ protein in an affinity chromatography coupling buffer and 5% DMSO was added to the resin (500 µg, 1 ml) and incubated at room temperature (2 h) and then at 4°C (overnight). Subsequently, the resin was incubated with Tris buffer for 2 h at room temperature in order to block the reactive groups of the resin and then washed alternately with Tris and acetate buffers. Affinity column was stored in PBS buffer at 4°C. In order to purify antibodies. The crude isolate of anti- His<sub>6</sub>-PssJ IgY antibodies (150 µl) was diluted with PBS (1:1, *v/v*) and incubated with the resin for 1 h at room temperature. Unbound antibodies were removed by gravity flow (**A**, FT) and the resin was extensively washed with PBS-T (**A**, W1-W10), and PBS (**A**, P1-P5). Specific anti- His<sub>6</sub>-PssJ IgY antibodies were eluted from the resin with citrate buffer and immediately neutralized with 1M Tris-base (**A**, K1-K5). The column was used repeatedly, each time thoroughly rinsed with PBS and stored at 4°C. K1-K5 fractions were pooled and concentrated with the use of centrifugal concentrators and their reactivity was compared in the standard Western blot (**B**) to the reactivity of the crude specific IgYs isolate (1 µg/ml in 0.5% skimmed milk in PBST) with the use of rabbit anti-IgY IgG-HRP antibodies.
